# Supplementary material for: Disruption of Mitochondrial‐associated ER membranes by HIV‐1 tat protein contributes to premature brain aging
Source: PubMed Central journal article supplement (PMC9804058; doi:10.1111/cns.14011), 2022-11-23

# Full Unedited gel/blots presented in Fig 3Q

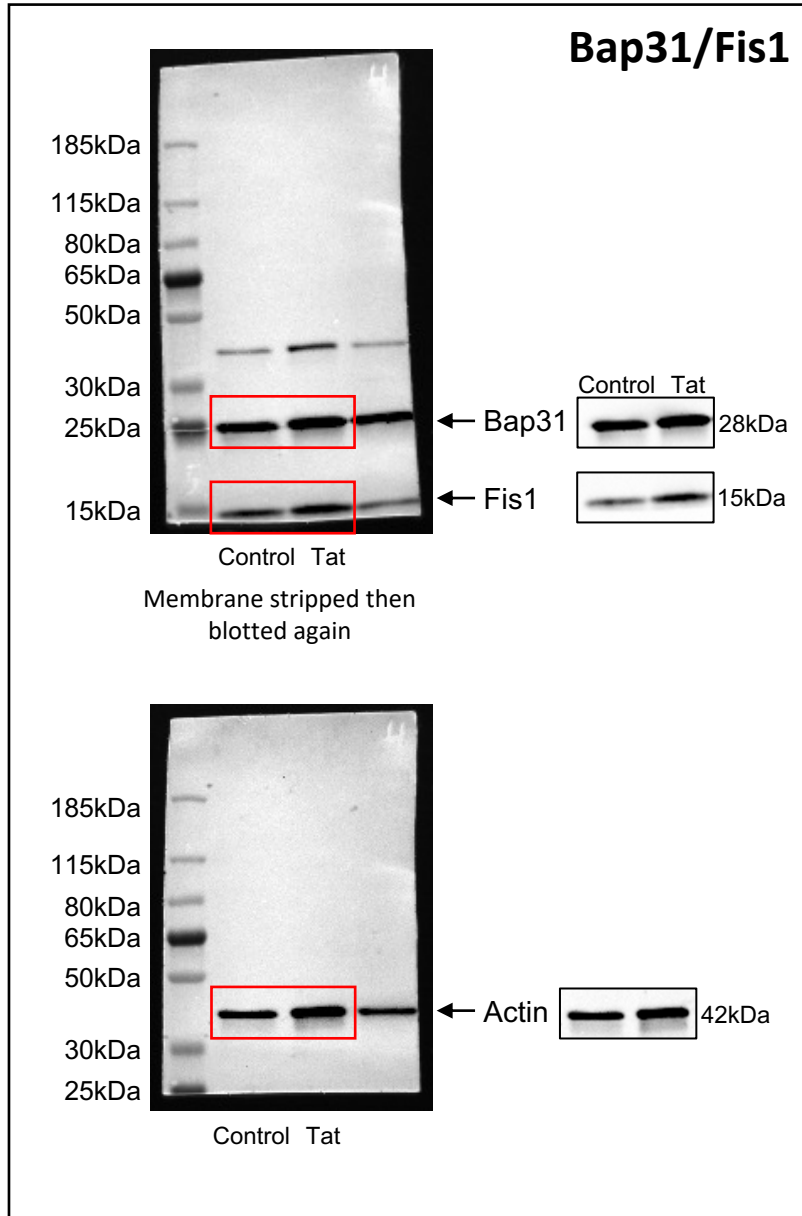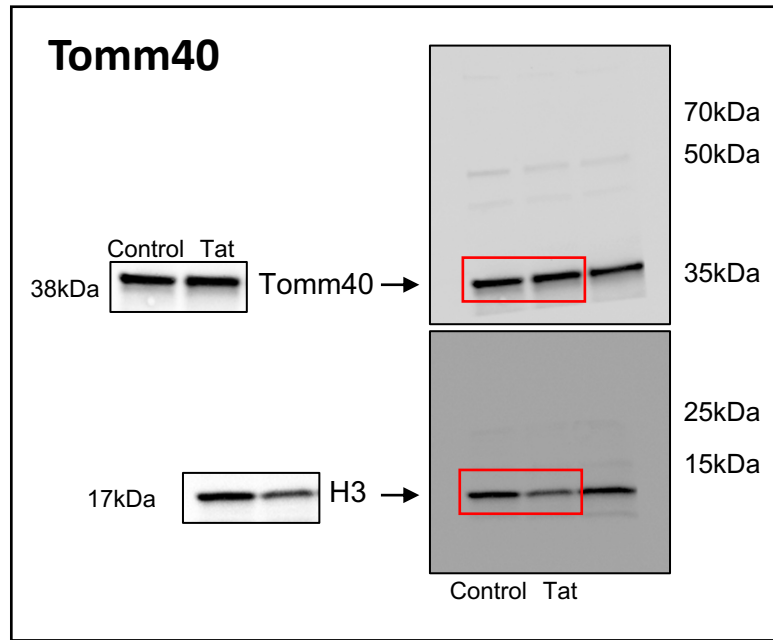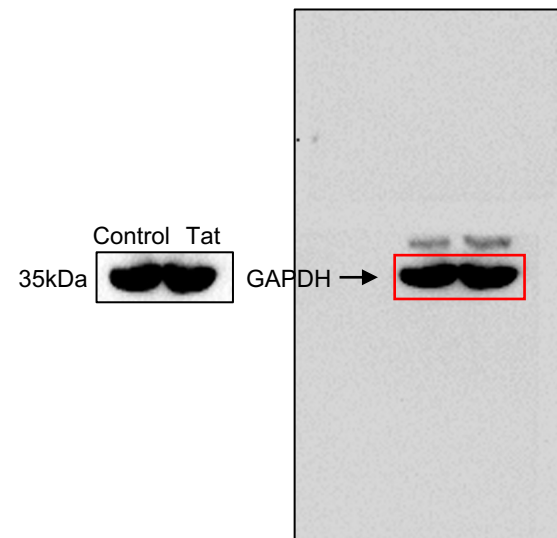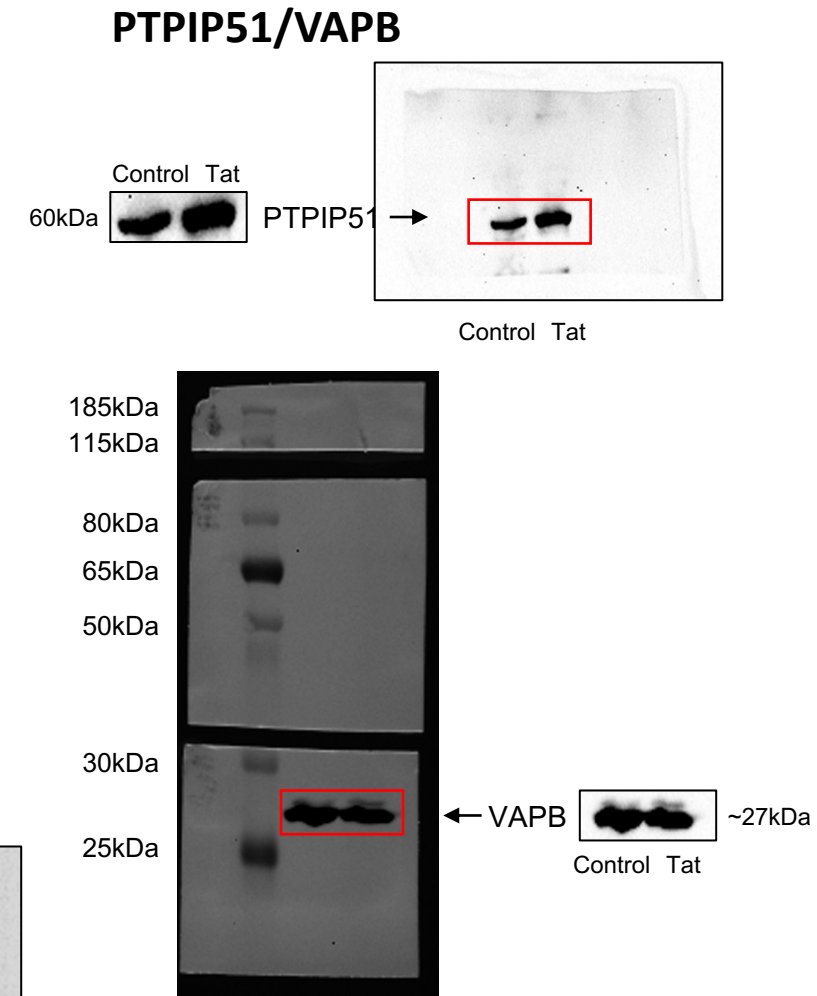

# Full Unedited gel/blots presented in Fig 3Q IP3R/VDAC

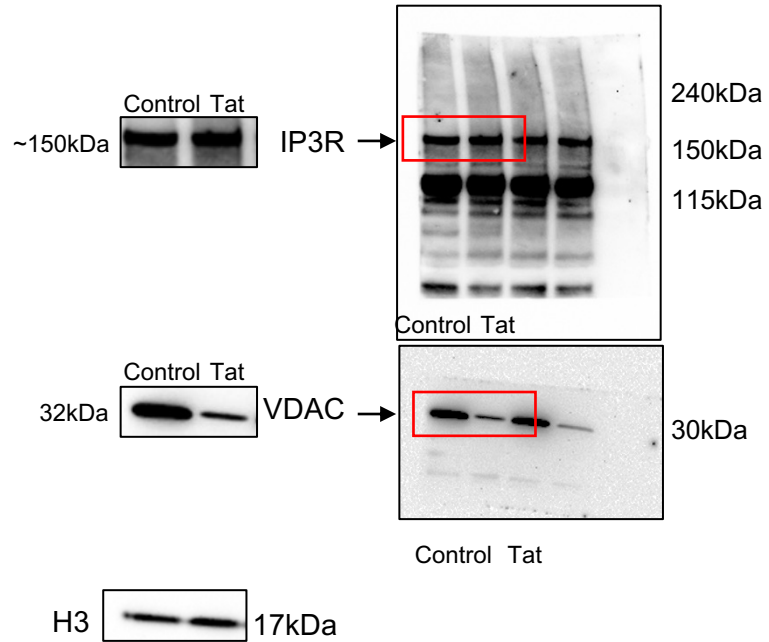

**We removed H3 because we could not find the original on the machine (maybe inadvertently deleted)**

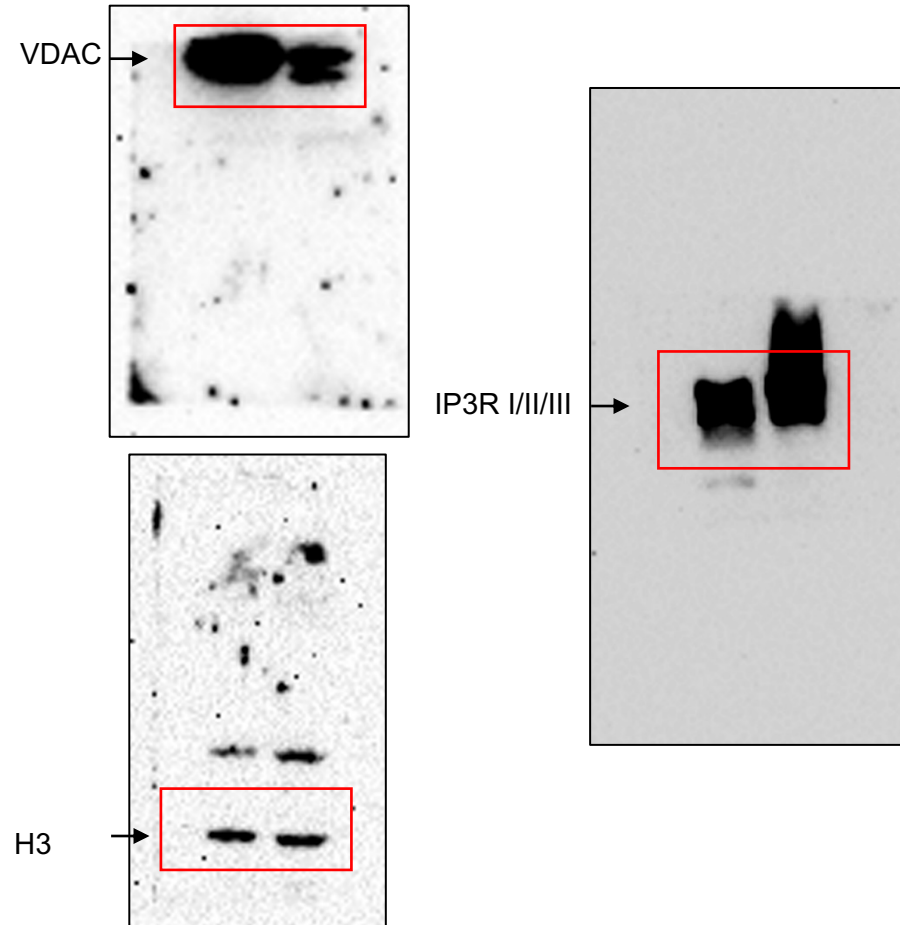

**Another Western IP3R/VDAC**

# Full Unedited gel/blots presented in Fig 5B

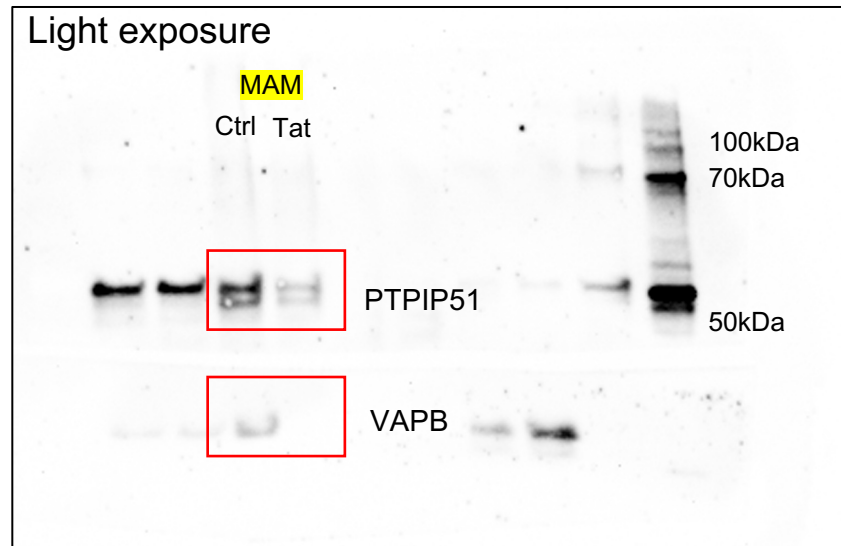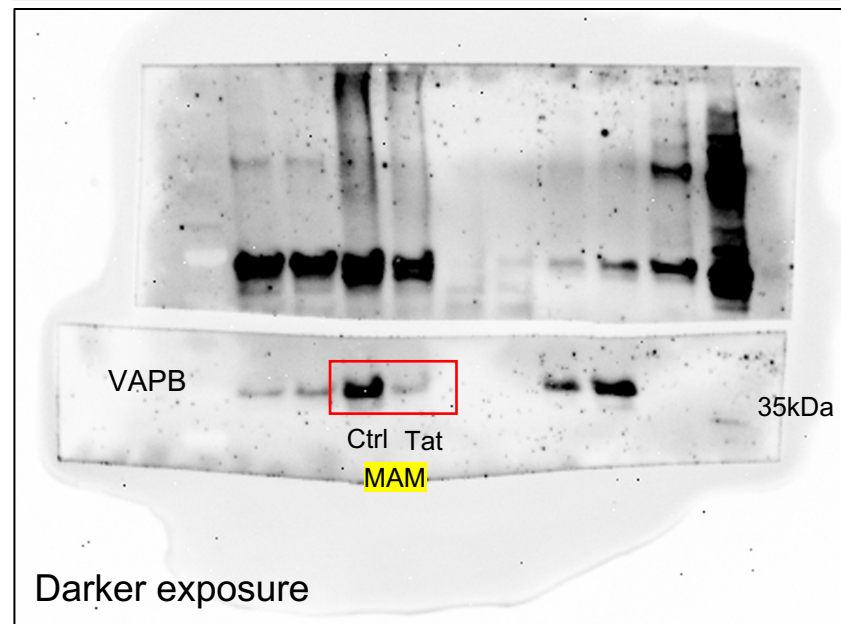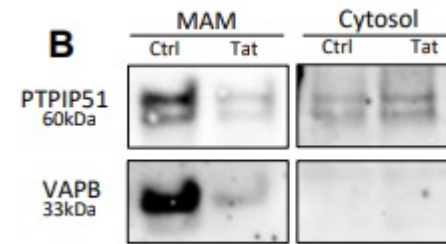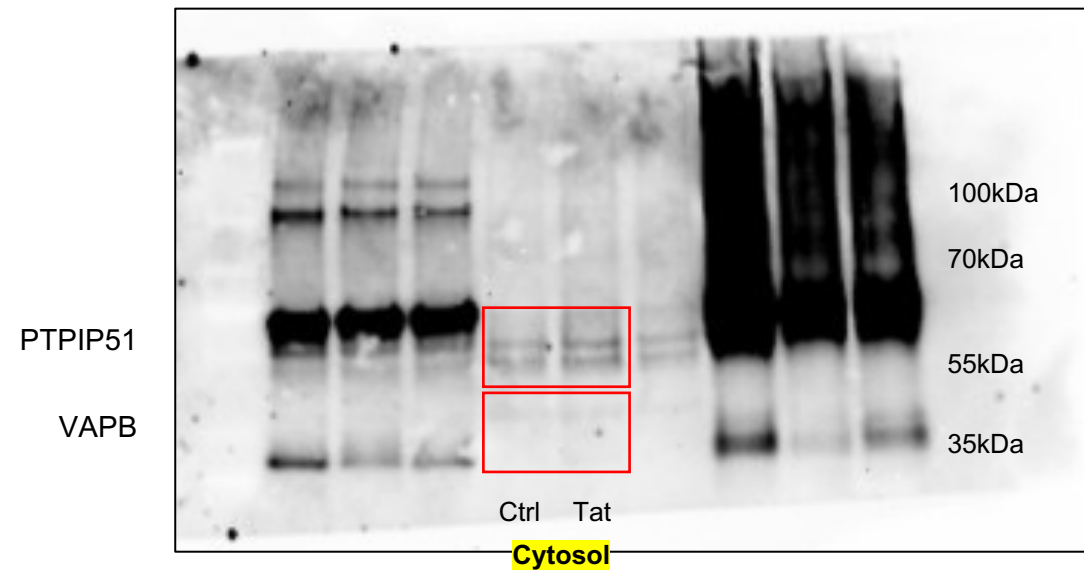

Supplement: CNS-29-365-s001.pdf [file CNS-29-365-s001.pdf]
